# Supplementary figures and images for: Inoculation of the Leishmania infantum HSP70-II Null Mutant Induces Long-Term Protection against L. amazonensis Infection in BALB/c Mice
Source: MDPI journal article supplement (doi:10.3390/microorganisms9020363), 2021-02-12

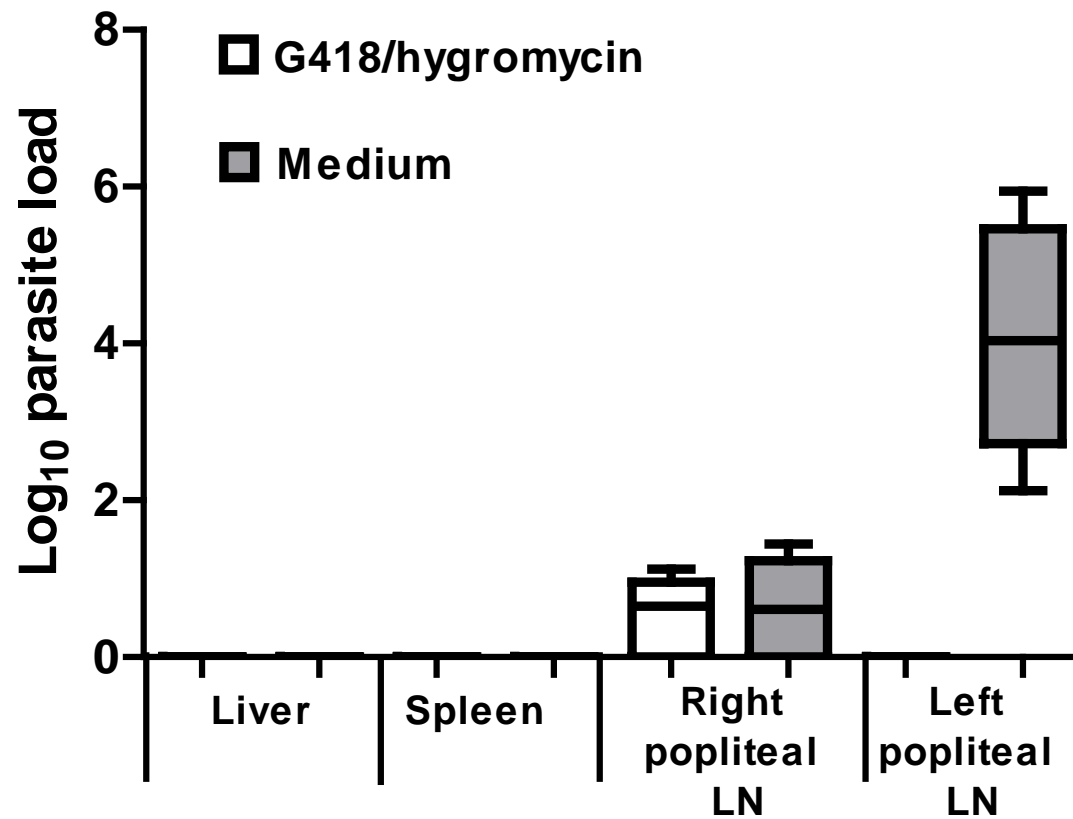

Supplement: s1 [file s1]

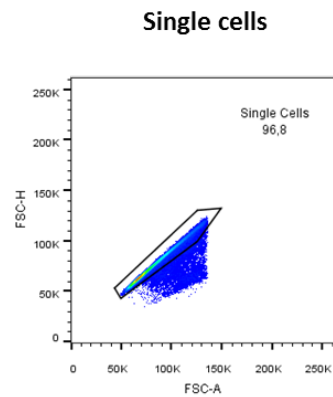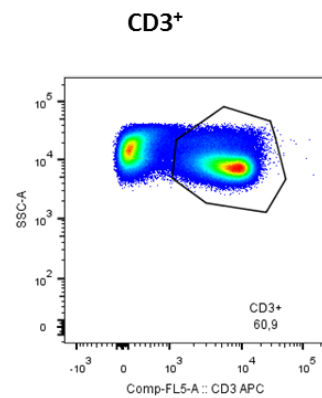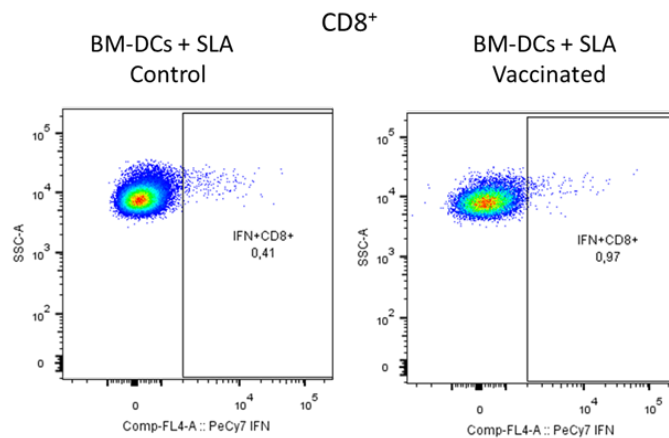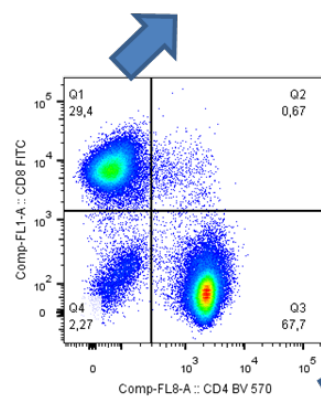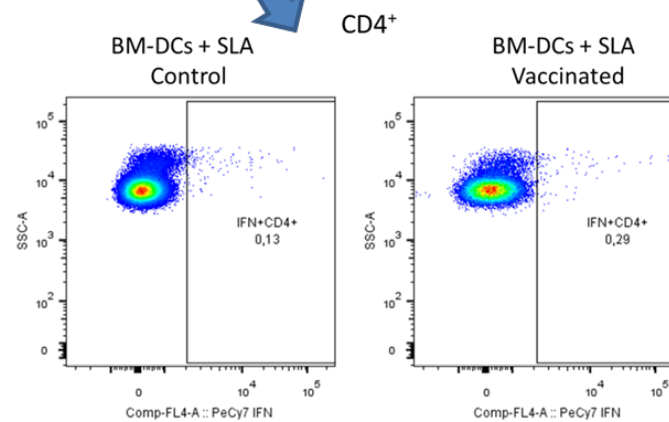

Supplement: s1 [file s1]
